# Supplementary material
Source: publisher figshare collection journal article supplement (https://acs.figshare.com/ndownloader/files/21537330)
Supplement: Supplementary file 1 [file 21537330]

# **Electronic supplementary information**

**For**

## **Multifunctional single-layered graphene quantum dots used for diagnosis of mitochondrial malfunction-related diseases**

Xiao Li Jiang,<sup>a</sup> Jia Hui Liu,<sup>b</sup> Yan Ting Que,<sup>a</sup> Yu Mei Que,<sup>a</sup> Ping Ping Hu,<sup>\*a</sup> Cheng Zhi Huang  
and Xiao Yong Tong<sup>\*a</sup>

Email: Ping Ping Hu-[huping07@163.com](mailto:huping07@163.com); Xiao Yong Tong-[xiaoyongtong@cqu.edu.cn](mailto:xiaoyongtong@cqu.edu.cn)

<sup>\*</sup>Corresponding author

Number of pages: 3

number of figures: 3

## Figures

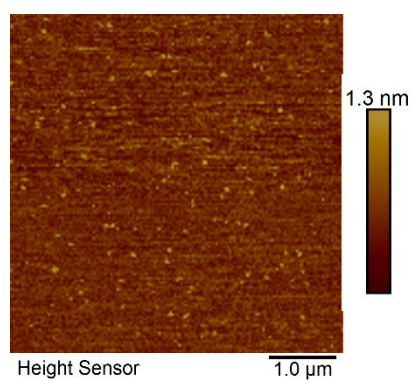

**Figure S1** AFM image of s-GQDs.

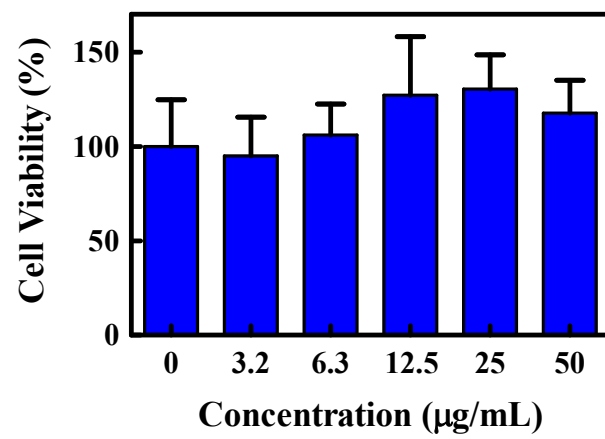

**Figure S2** Concentration-dependent cytotoxicity of s-GQDs after 48 h of incubation with WT SMCs. Data are expressed as means  $\pm$  SD of 3 independent experiments.

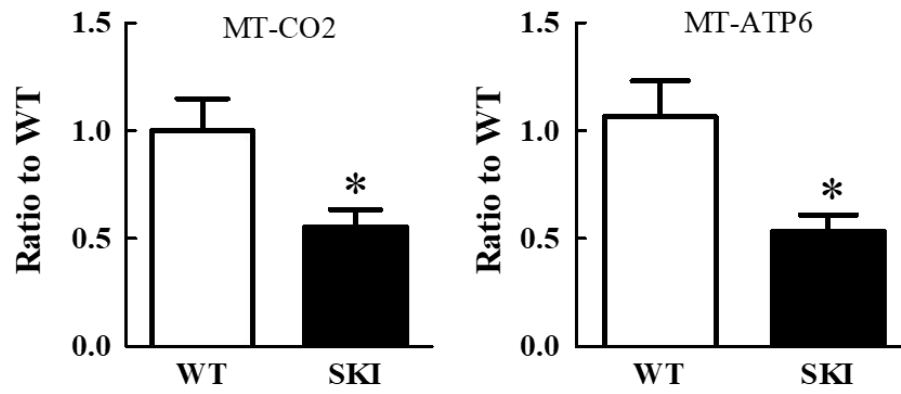

**Figure S3** mRNA quantification of MT-CO2 and MT-ATP6 expression in aorta of WT/SKI mice.

Statistical significance of differences in mean values: \* $p < 0.05$ , *versus* WT, n=5-7.
